# Supplementary material for: Hydrophobic functionalization of a metal–organic framework as an ammonia visual sensing material under high humidity conditions
Source: Royal Society of Chemistry journal article supplement (doi:10.1039/d3dt04292h), 2024-01-01
Supplement: d3dt04292h1.pdf [file d3dt04292h1.pdf]

## **Electronic Supporting Information**

### **Hydrophobic functionalization of metal-organic framework as ammonia visual sensing material for high humidity**

Yuxin Wang<sup>a</sup>, Zhengxuan Song<sup>a</sup>, Yutao Liu<sup>a</sup>, Yang Chen<sup>a</sup>, Jinping Li<sup>a</sup>, Libo Li<sup>a\*</sup>, Jia Yao<sup>b\*</sup>

<sup>a</sup>College of Chemical Engineering and Technology, State Key Laboratory of Clean and Efficient Coal Utilization, Taiyuan University of Technology, Taiyuan 030024, China.

<sup>b</sup>Department of Gastroenterology, Shanxi Bethune Hospital, Shanxi Academy of Medical Sciences, Tongji Shanxi Hospital, Third Hospital of Shanxi Medical University, Taiyuan 030024, China

E-mail: lilibo@tyut.edu.cn; yaojia2006@163.com

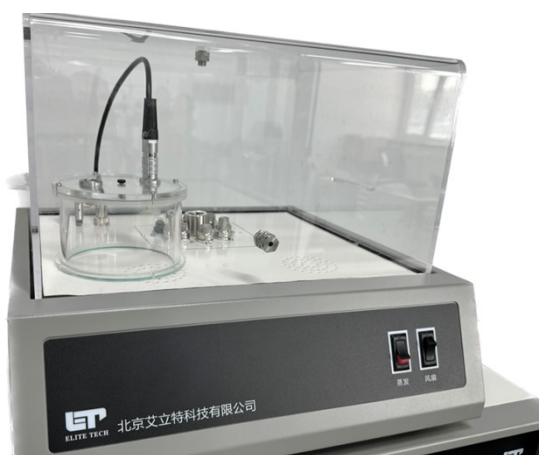

**Fig. S1** Digital images of static volumetric device.

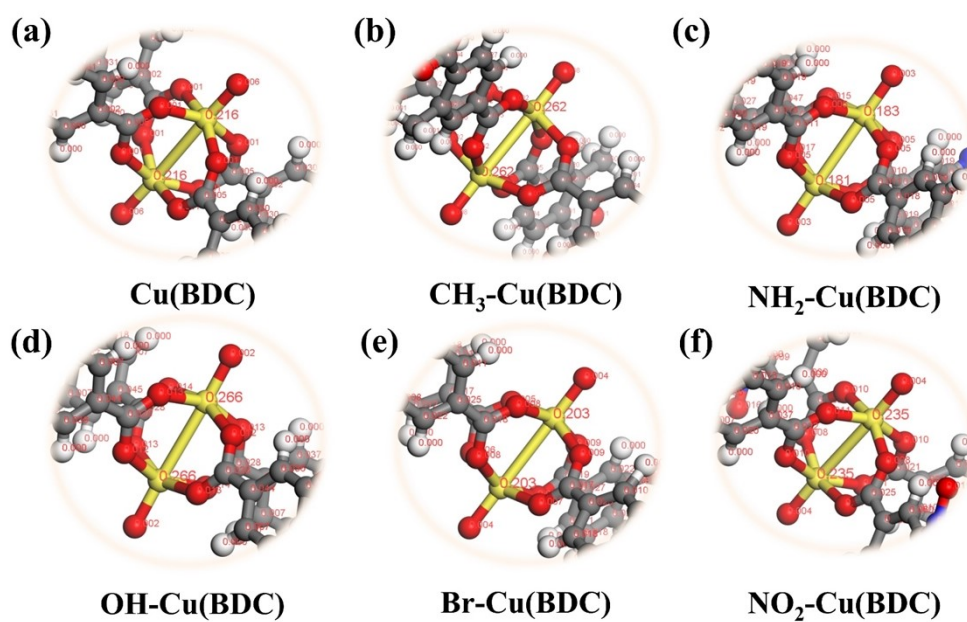

**Fig. S2** Electrophilicity of Cu(BDC) and functionalized Cu(BDC).

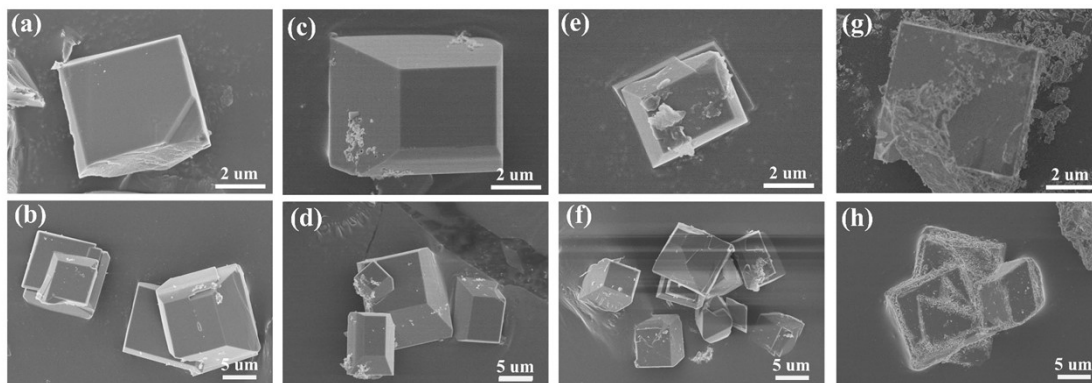

**Fig. S3** SEM images of CH<sub>3</sub>-Cu(BDC) (a-b), NH<sub>3</sub>@CH<sub>3</sub>-Cu(BDC) (c-d), activated CH<sub>3</sub>-Cu(BDC) (e-f) and NH<sub>3</sub>@CH<sub>3</sub>-Cu(BDC) after 10 cycles (g-h).

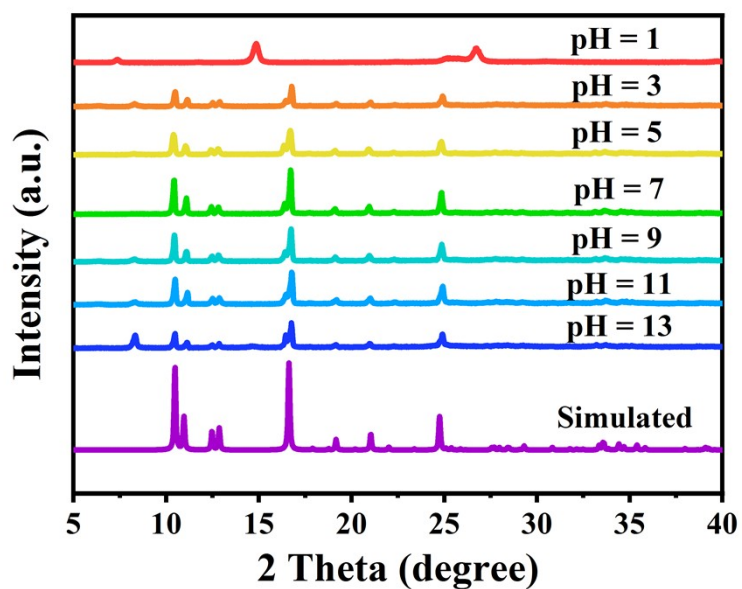

**Fig. S4** PXRD profiles of CH<sub>3</sub>-Cu(BDC) samples soaked in the aqueous solutions with pH = 1, 3, 5, 7, 9, 11, 13 solution for 24 h.

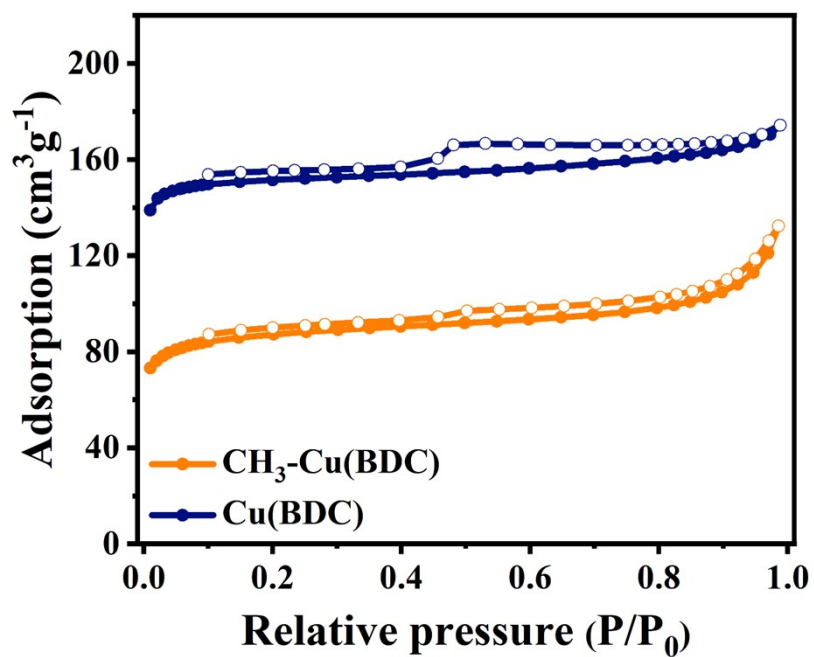

**Fig. S5** N<sub>2</sub> sorption isotherms of CH<sub>3</sub>-Cu(BDC) and Cu(BDC) at 77 K. The Brunauer-Emmett-Teller (BET) surface area was 339 m<sup>2</sup>g<sup>-1</sup>, there is decreased by 44% compared with Cu(BDC) (603 m<sup>2</sup>g<sup>-1</sup>)

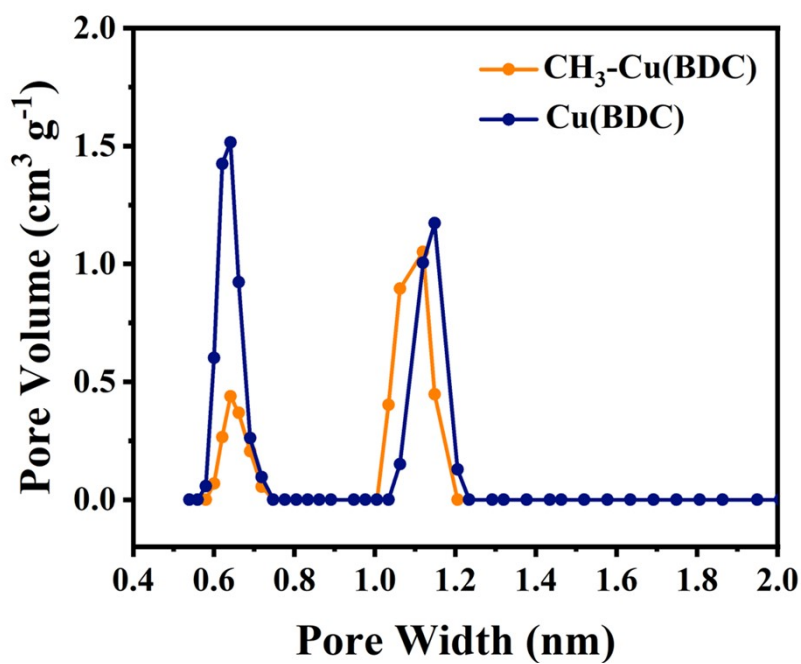

**Fig. S6** The pore-size distribution of CH<sub>3</sub>-Cu(BDC) and Cu(BDC).

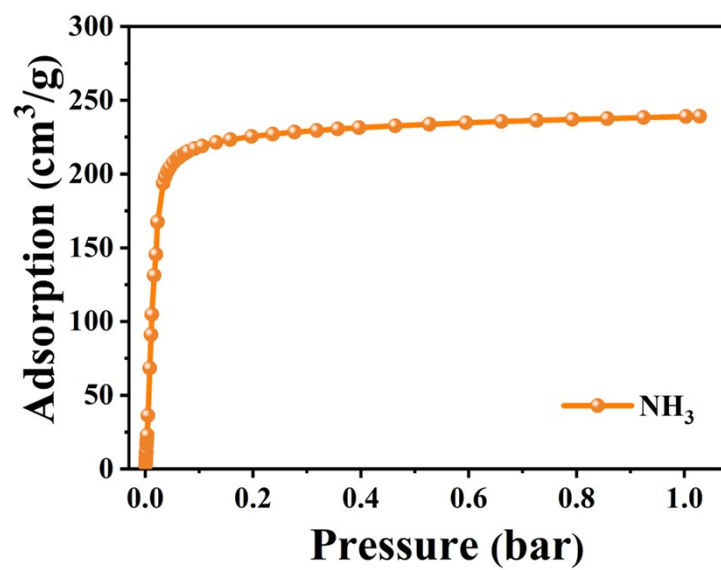

**Fig. S7** Ammonia adsorption isotherm of  $\text{CH}_3\text{-Cu(BDC)}$ .

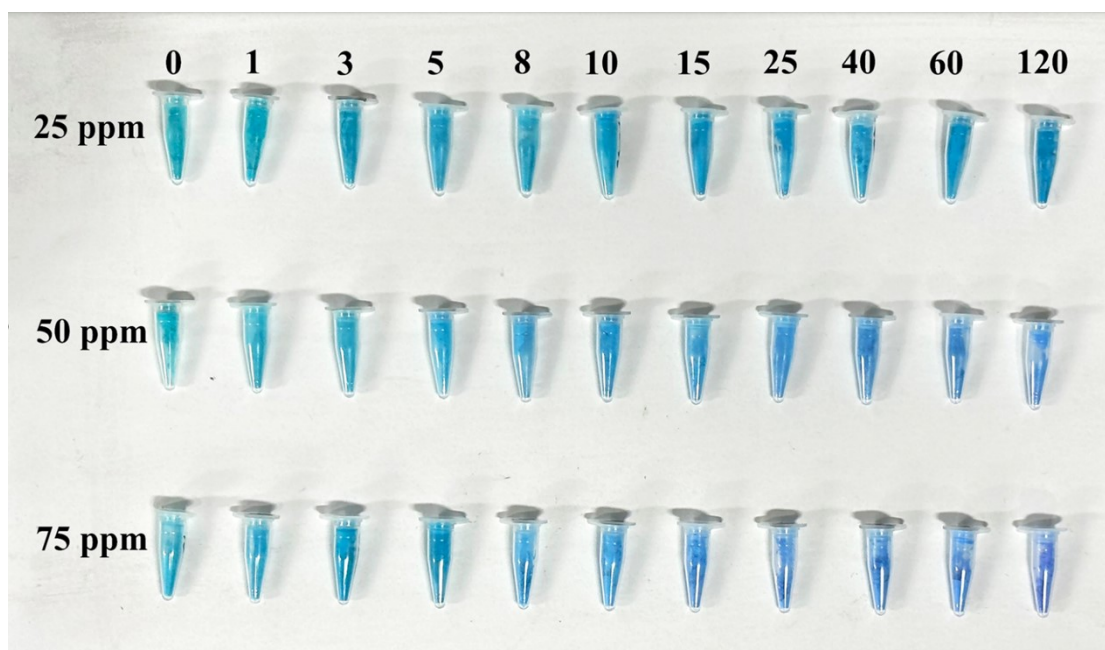

**Fig. S8** Digital images of  $\text{CH}_3\text{-Cu(BDC)}$  after exposed to 25, 50 and 75 ppm  $\text{NH}_3$  for different times.

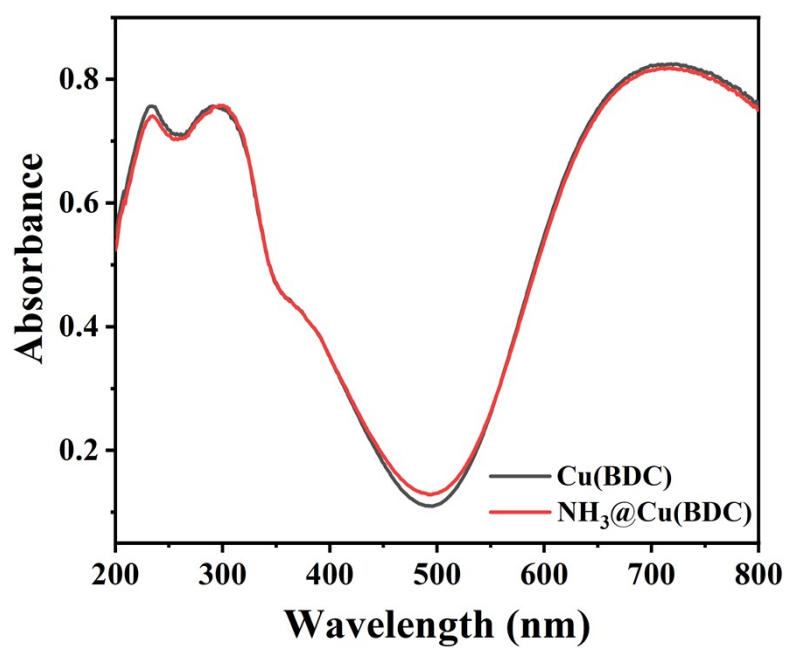

**Fig. S9** UV-vis DRS of Cu(BDC) exposed to 50 ppm NH<sub>3</sub> for 25 min.

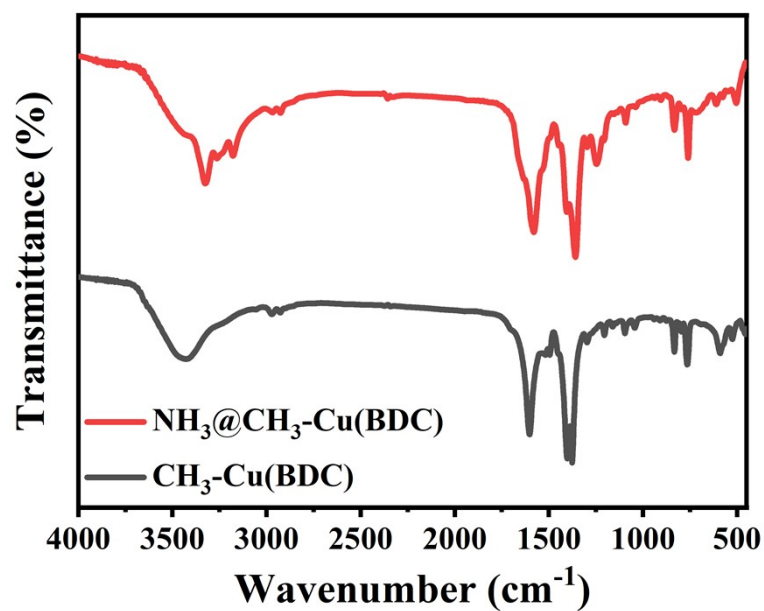

**Fig. S10** FT-IR spectra of CH<sub>3</sub>-Cu(BDC) and NH<sub>3</sub>@CH<sub>3</sub>-Cu(BDC).

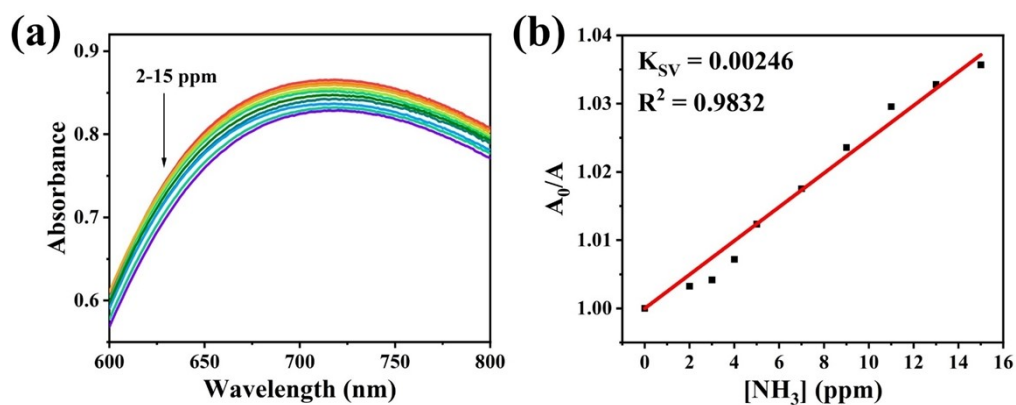

**Fig. S11** (a) UV-Vis DRS of  $\text{CH}_3\text{-Cu(BDC)}$  after exposed to 2, 3, 4, 5, 7, 9, 11, 13 and 15 ppm ammonia. (b) Absorbance curve over ammonia levels.

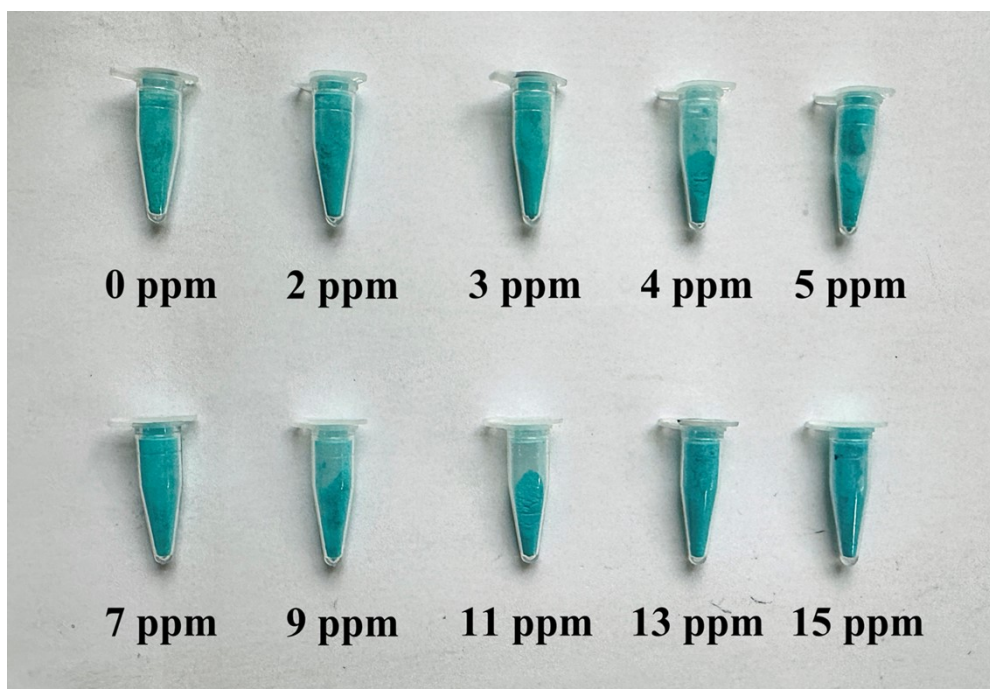

**Fig. S12** Digital images of  $\text{CH}_3\text{-Cu(BDC)}$  after exposed to 2, 3, 4, 5, 7, 9, 11, 13 and 15 ppm ammonia.

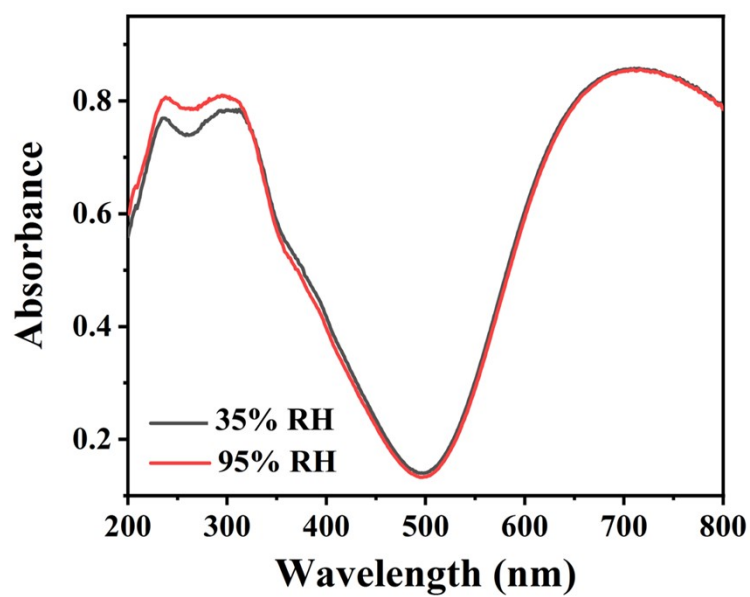

**Fig. S13** UV-Vis DRS of  $\text{CH}_3\text{-Cu(BDC)}$  after exposed to different relative humidity.

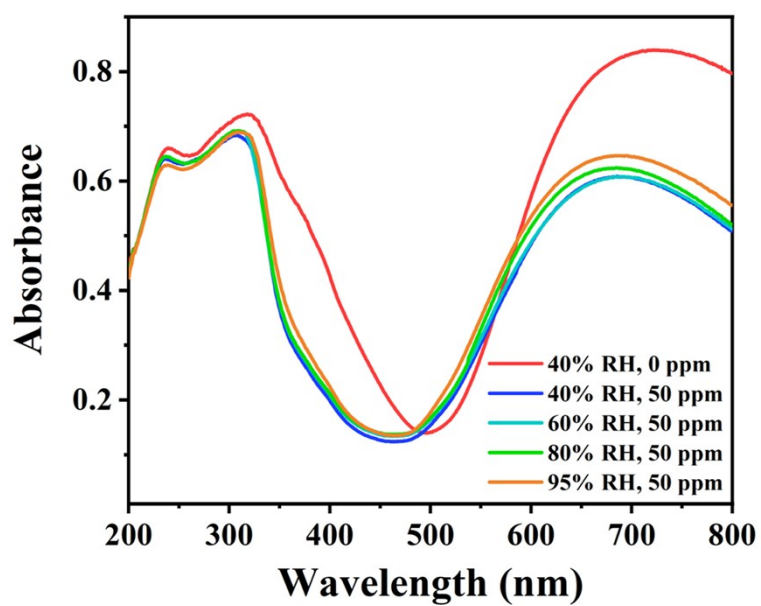

**Fig. S14** UV-Vis DRS of  $\text{CH}_3\text{-Cu(BDC)}$  exposed to 50 ppm  $\text{NH}_3$  with different relative humidity.

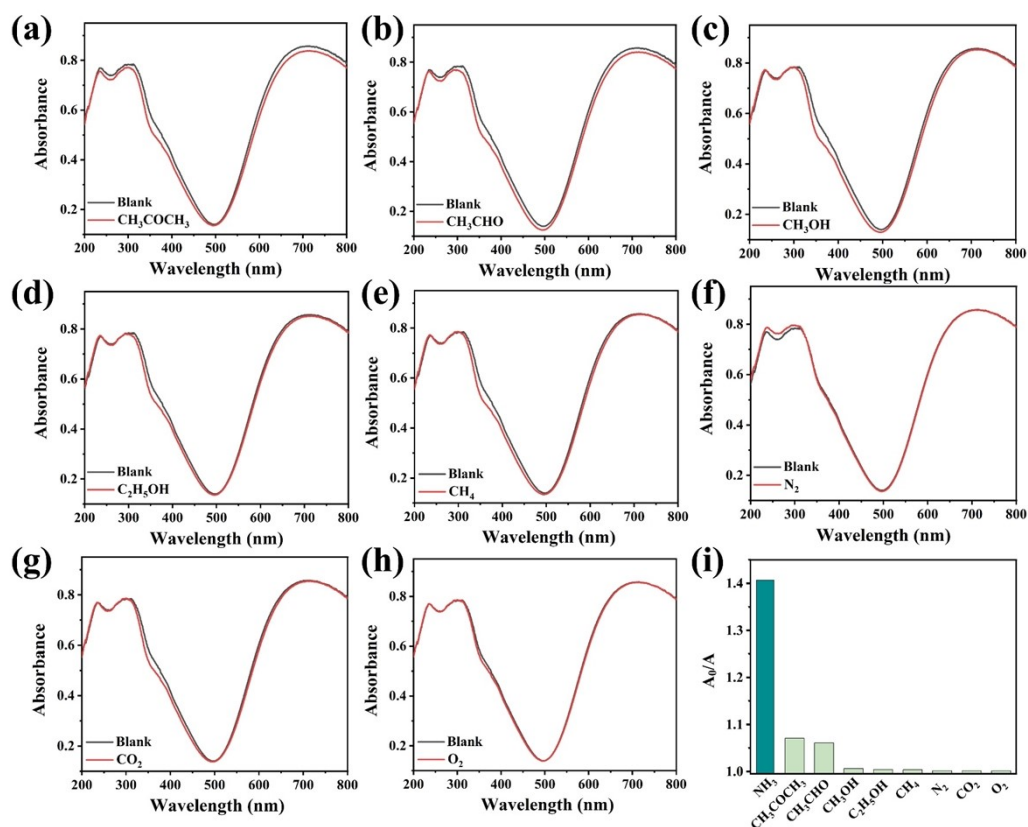

**Fig. S15** Response of  $\text{CH}_3\text{-Cu(BDC)}$  against  $\text{NH}_3$  and other exhaled air. The concentration of acetone, acetaldehyde, methanol and ethanol were 50 ppm, the rest of gases were high-purity.

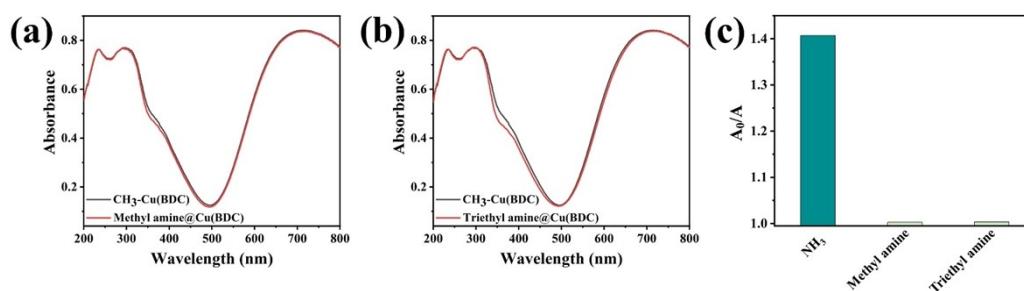

**Fig. S16** (a-b) UV-Vis DRS of  $\text{CH}_3\text{-Cu(BDC)}$  exposed to 50 ppm methylamine (a) and triethylamine (b) atmosphere. (c) Response of  $\text{CH}_3\text{-Cu(BDC)}$  against  $\text{NH}_3$  and bulkier amines.

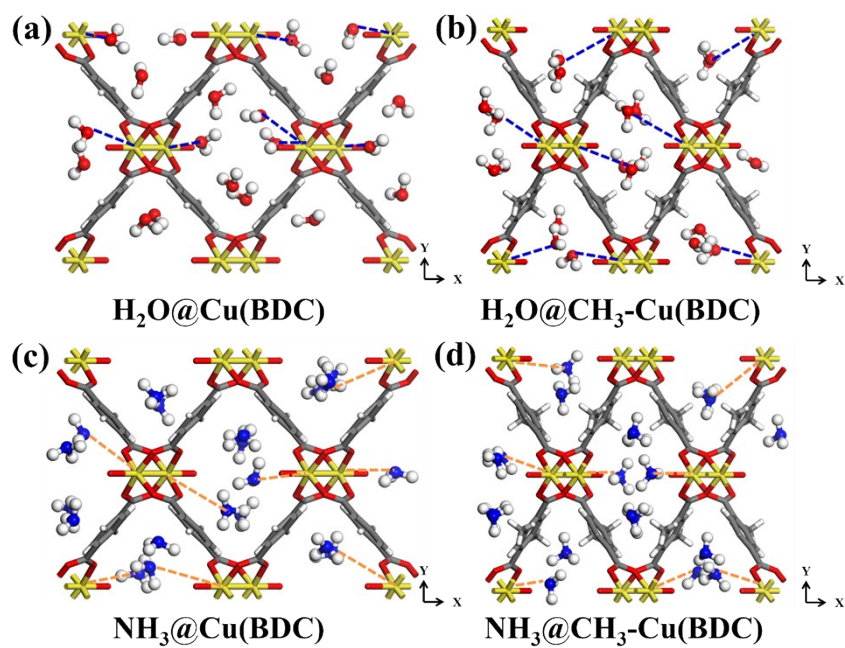

**Fig. S17** GCMC simulations of  $\text{H}_2\text{O}$  and  $\text{NH}_3$  adsorption sites in  $\text{Cu}(\text{BDC})$  and  $\text{CH}_3\text{-Cu}(\text{BDC})$ .

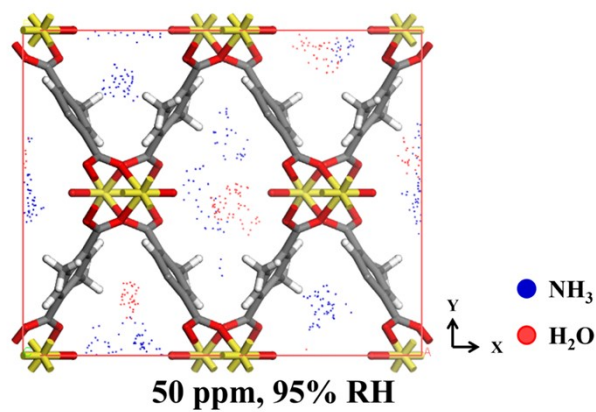

**Fig. S18** GCMC simulations of the competitive adsorption between  $\text{H}_2\text{O}$  and  $\text{NH}_3$  on  $\text{CH}_3\text{-Cu}(\text{BDC})$  (50 ppm  $\text{NH}_3$ , 95 % RH).

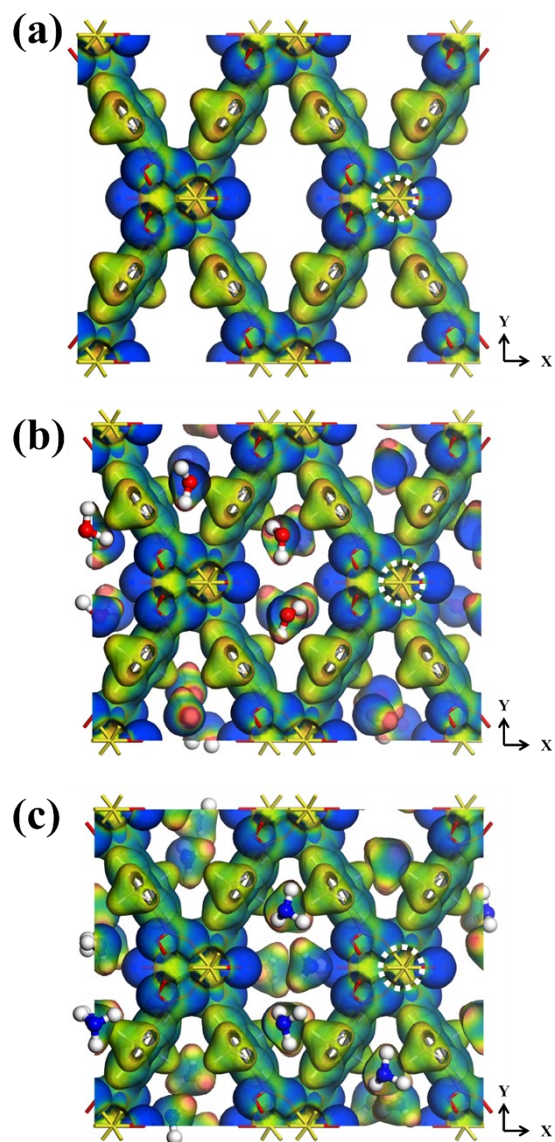

**Fig. S19** Electrostatic potential patterns of (a)  $\text{CH}_3\text{-Cu(BDC)}$ , (b)  $\text{H}_2\text{O@CH}_3\text{-Cu(BDC)}$  and  $\text{NH}_3\text{@CH}_3\text{-Cu(BDC)}$ .

| Items           | Blood ammonia                    | Exhale ammonia | Abnormal |
|-----------------|----------------------------------|----------------|----------|
| Reference value | 10.0-47.0 $\mu\text{mol L}^{-1}$ | 0.05-1.5 ppm   |          |
| Patient 1       | 48.3 $\mu\text{mol L}^{-1}$      | 3.05 ppm       | ↑        |
| Patient 2       | 50.0 $\mu\text{mol L}^{-1}$      | 3.88 ppm       | ↑        |
| Patient 3       | 50.1 $\mu\text{mol L}^{-1}$      | 3.91 ppm       | ↑        |

**Table S1** Compared of blood test and exhale test.

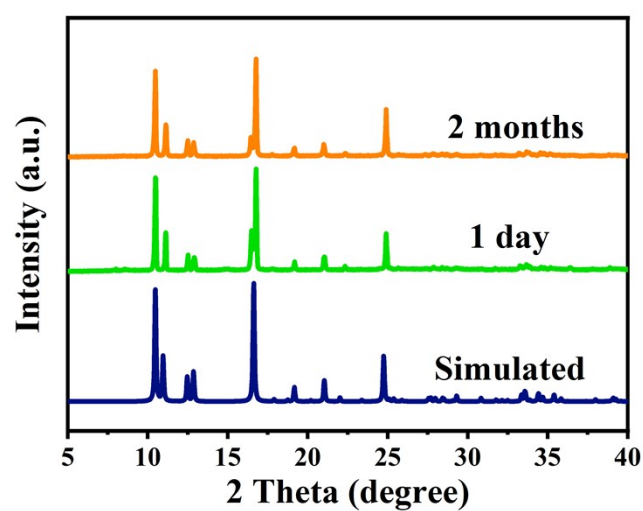

**Fig. S20** PXRd patterns of  $\text{CH}_3\text{-Cu-BTC}$  for 1 day and 2 months in the atmospheric environment.

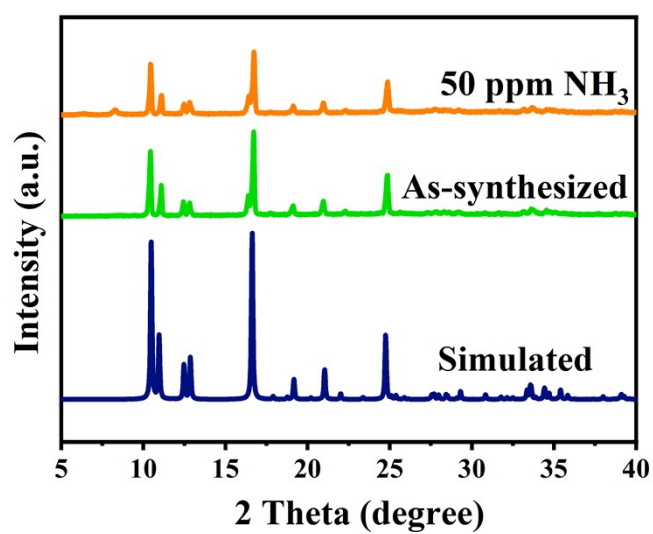

**Fig. S21** PXRd patterns of  $\text{CH}_3\text{-Cu-BTC}$  and  $\text{NH}_3@\text{CH}_3\text{-Cu(BDC)}$ .

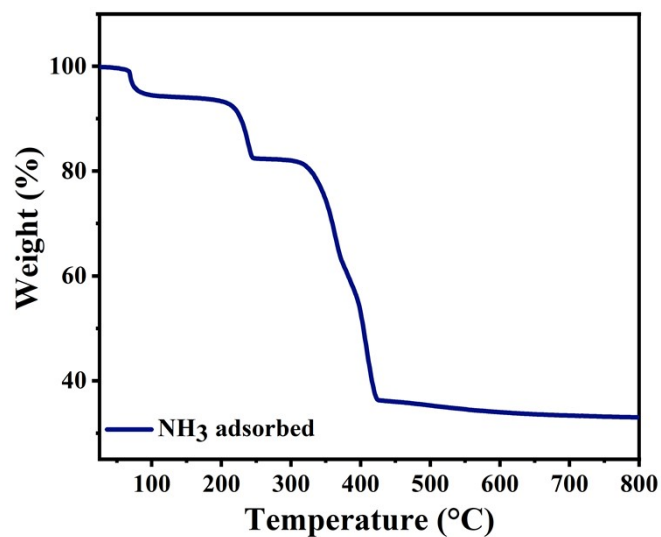

**Fig. S22** TGA curves of  $\text{NH}_3@\text{CH}_3\text{-Cu(BDC)}$  under  $\text{N}_2$  flow. The result show that the  $\text{NH}_3$  in  $\text{NH}_3@\text{CH}_3\text{-Cu(BDC)}$  will be desorbed at 80 °C

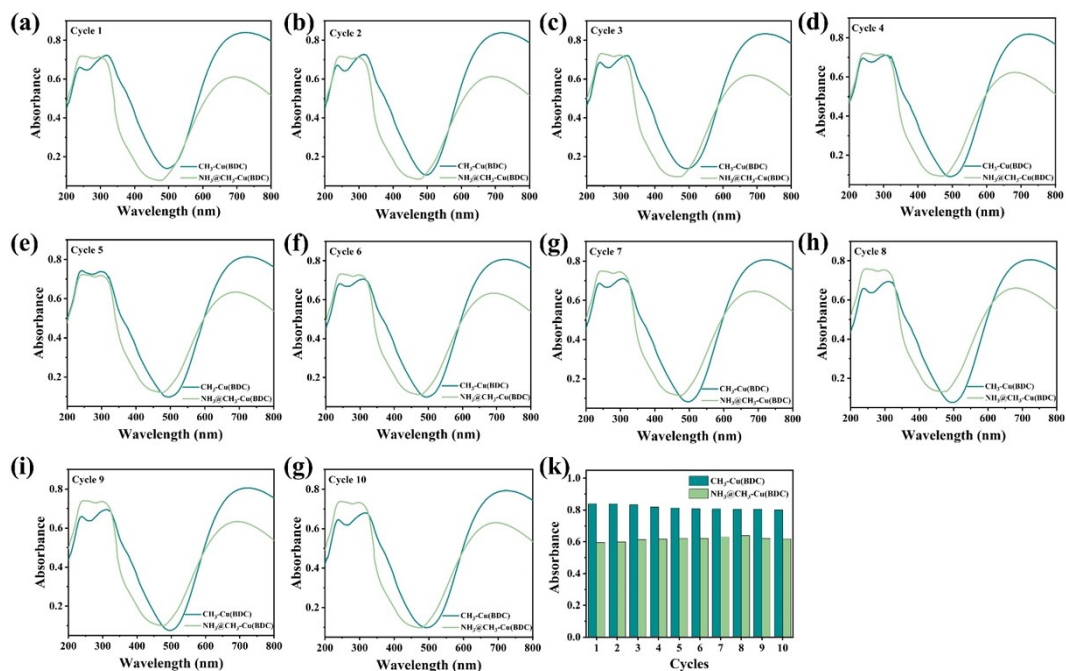

**Fig. S23** Response to  $\text{NH}_3$  (50 ppm) during 10 cycles of adsorption and desorption.
